# Supplementary material
Source: PubMed Central journal article supplement (PMC1851859)

**Supplementary Figure 1:** Microarray data showing expression of CLDN-1, -4 and -7 in normal esophageal keratinocytes (EPC2, and EPC1a), and in SCC cell lines from the esophagus, TE1,8, 11 and 12. The image was quantified and expression values generated using MAS 5.1 (MicroArray Suite, Affymetrix) with the default parameters for the statistical algorithm. For chip normalization, probe sets were scaled to a target intensity of 150.

# Supplementary Figure 1

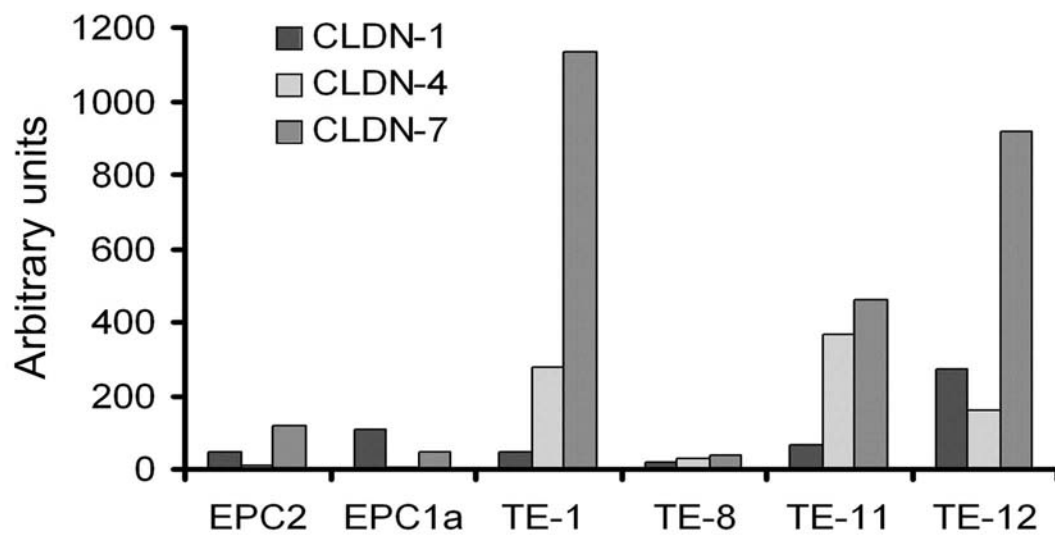

Supplement: amjpathol_170_2_709__1.pdf [file amjpathol_170_2_709__1.pdf]
