# Supplementary material
Source: PubMed Central journal article supplement (PMC1851859)
Supplement: amjpathol_170_2_709__2.pdf [file amjpathol_170_2_709__2.pdf]

**Supplementary Table 1**

| Case   | Age/Sex | Stage | Grade | Location | Claudin-7 | E-cadherin |
|--------|---------|-------|-------|----------|-----------|------------|
| 1      | 56/F    | 2A    | 3     | C        | 0         | 2          |
| 2      | 59/F    | 1     | 3     | C        | 1         | 2          |
| 3      | 67/F    | 3     | 2     | C        | 1         | 2          |
| 4      | 77/F    | 2A    | 3     | C        | 0         | 1          |
| 5      | 52/M    | 2B    | 2     | C        | 0         | 2          |
| 6      | 77/M    | 3-4   | 3     | C        | 2         | 2          |
| 7      | 53/M    | 3     | 3     | C        | 1         | 1          |
| Normal | n/a     | n/a   | n/a   | M        | 2         | 2          |
| Normal | n/a     | n/a   | n/a   | M        | 2         | 2          |

**Supplementary Table 1:** Expression and localization of Claudin-7 and E-cadherin on the Fox Chase Cancer Center esophageal squamous cell carcinoma tissue array. Expression levels were scored by two independent observers on a scale of 0-2, where 2 indicates the highest level of expression. C = cytoplasmic staining and M = membrane associated Claudin-7 staining.

Supplementary Table 2

| Coordinate | Sex | Age | Type                | TNM Stage           | Claudin-7 | E-cadherin |
|------------|-----|-----|---------------------|---------------------|-----------|------------|
| 1A         | m   | 66  | well                | T3N1M0 ( III )      | 0         | 1          |
| 2A         | m   | 67  | well                | T1N1M0 ( II B )     | 2c        | 1          |
| 3A         | m   | 69  | well                | T1N0M0 ( I )        | 1c        | 0          |
| 4A         | m   | 60  | well                | T1N0M0 ( I )        | 1c        | 0          |
| 5A         | m   | 50  | well                | T1N0M0 ( I )        | 2c        | 0          |
| 6B         | m   | 79  | moderate            | T3N1M0 ( III )      | 0         | 0          |
| 7B         | m   | 59  | moderate            | T3N1M1 ( IV )       | 0         | 0          |
| 8B         | m   | 54  | moderate            | T1N1M0 ( II B )     | 0         | 0          |
| 9B         | m   | 69  | moderate            | T1N0M0 ( I )        | 0         | 0          |
| 10B        | m   | 55  | moderate            | T1N0M0 ( I )        | 1c        | 0          |
| 11C        | m   | 73  | moderate            | T3N1M0 ( III )      | 0         | 0          |
| 12C        | m   | 63  | moderate            | T4N0M0 ( III )      | 0         | 0          |
| 13C        | m   | 57  | moderate            | T2N1M0 ( II B )     | 2c        | 0          |
| 14C        | m   | 58  | moderate            | T2N1M1 ( IV )       | 0         | 0          |
| 15C        | m   | 75  | moderate            | T3N1M0 ( III )      | 0         | 0          |
| 16D        | f   | 64  | moderate            | T3N0M0 ( II A )     | 0         | 0          |
| 17D        | f   | 58  | moderate            | T2N0M0 ( II A )     | 0         | 0          |
| 18D        | m   | 67  | moderate            | T2N0M0 ( II A )     | 0         | 0          |
| 19D        | m   | 77  | moderate            | T3N0M0 ( II A )     | 1c        | 0          |
| 20D        | m   | 69  | moderate            | T2N1M0 ( II B )     | 0         | 0          |
| 21E        | m   | 61  | moderate            | T3N0M1a ( IV<br>A ) | 1c        | 0          |
| 22E        | m   | 56  | moderate            | T1N0M1a ( IV<br>A ) | 0         | 0          |
| 23E        | m   | 68  | moderate            | T2N0M0 ( II A )     | 0         | 0          |
| 24E        | m   | 61  | moderate            | T3N1M0 ( III )      | 0         | 0          |
| 25E        | m   | 60  | moderate            | T4N0M0 ( III )      | 0         | 0          |
| 26F        | m   | 71  | moderate            | T1N0M0 ( I )        | 0         | 0          |
| 27F        | m   | 61  | moderate            | T1N0M0 ( I )        | 0         | 1          |
| 28F        | m   | 62  | moderate            | T1N1M0 ( II B )     | 0         | 0          |
| 29F        | m   | 60  | moderate            | T3N1M0 ( III )      | 0         | 0          |
| 30F        | m   | 62  | poorly              | T2N0M0 ( II A )     | 0         | 0          |
| 31G        | m   | 66  | poorly              | T3N0M1a ( IV<br>A ) | 0         | 0          |
| 32G        | m   | 73  | poorly              | T1N0M0 ( I )        | 0         | 0          |
| 33G        | m   | 56  | poorly              | T3N1M0 ( III )      | 0         | 0          |
| 34G        | m   | 69  | n/a                 | T2N1M0 ( II B )     | 1c        | 0          |
| 35G        | m   | 73  | n/a                 | n/a                 | 1c        | 0          |
| 36H        | m   | 70  | moderately<br>-well | T1N0M1 ( IV )       | 0         | 1          |

|     |     |     |                         |                 |    |   |
|-----|-----|-----|-------------------------|-----------------|----|---|
| 37H | m   | 68  | moderately<br>-well     | T3N1M0 ( III )  | 0  | 0 |
| 38H | m   | 71  | moderately<br>to poorly | T3N0M0 ( II A ) | 0  | 0 |
| 39H | m   | 80  | n/a                     | T1N1M0 ( II B ) | 1c | 0 |
| 40H | m   | 68  | n/a                     | T1N0M0 ( I )    | 1c | 0 |
| 41I | n/a | n/a | non-<br>neoplastic      |                 | 1m | 1 |
| 42I | n/a | n/a | non-<br>neoplastic      |                 | 2m | 1 |
| 43I | n/a | n/a | non-<br>neoplastic      |                 | 2m | 1 |
| 44I | n/a | n/a | non-<br>neoplastic      |                 | 2m | 1 |

**Supplementary Table 2:** Expression and localization of Claudin-7 and E-cadherin on a commercially available esophageal squamous cell carcinoma tissue array (Accurate Chemical Company). Expression levels were scored by two independent observers on a scale of 0-2, where 2 indicates the highest level of expression. C = cytoplasmic staining and M = membrane associated staining.
